# Supplementary material for: Prevalence, Antibiotics Resistance and Plasmid Profiling of Vibrio spp. Isolated from Cultured Shrimp in Peninsular Malaysia
Source: MDPI journal article supplement (doi:10.3390/microorganisms10091851), 2022-09-16
Supplement: s1 [file s1]

Supplementary materials

**Table S1.** Information on *Vibrio* spp. isolates found in this study.

| Organism                       | Strain | Accession No. | Isolation Source       | Country            |
|--------------------------------|--------|---------------|------------------------|--------------------|
| <i>Vibrio communis</i>         | S1-3   | OP198216      | Shrimp: Hepatopancreas | Malaysia: Selangor |
| <i>Vibrio communis</i>         | S1-4   | OP198217      | Shrimp: Hepatopancreas | Malaysia: Selangor |
| <i>Vibrio parahaemolyticus</i> | S2-4   | OP198218      | Shrimp: Hepatopancreas | Malaysia: Selangor |
| <i>Vibrio</i> sp.              | S3-3   | OP198219      | Shrimp: Hepatopancreas | Malaysia: Selangor |
| <i>Vibrio</i> sp.              | S3-4   | OP198220      | Shrimp: Hepatopancreas | Malaysia: Selangor |
| <i>Vibrio</i> sp.              | S5-4   | OP198221      | Shrimp: Hepatopancreas | Malaysia: Selangor |
| <i>Vibrio</i> sp.              | S6-3   | OP198222      | Shrimp: Hepatopancreas | Malaysia: Selangor |
| <i>Vibrio campbellii</i>       | S7-4   | OP198223      | Shrimp: Hepatopancreas | Malaysia: Selangor |
| <i>Vibrio campbellii</i>       | S10-3  | OP198224      | Shrimp: Hepatopancreas | Malaysia: Selangor |
| <i>Vibrio campbellii</i>       | S10-4  | OP198225      | Shrimp: Hepatopancreas | Malaysia: Selangor |
| <i>Vibrio parahaemolyticus</i> | S12-3  | OP198226      | Shrimp: Hepatopancreas | Malaysia: Selangor |
| <i>Vibrio rotiferianus</i>     | S15-3  | OP198227      | Shrimp: Hepatopancreas | Malaysia: Selangor |
| <i>Vibrio parahaemolyticus</i> | S15-4  | OP198228      | Shrimp: Hepatopancreas | Malaysia: Selangor |
| <i>Vibrio campbellii</i>       | S17-3  | OP198229      | Shrimp: Hepatopancreas | Malaysia: Selangor |
| <i>Vibrio campbellii</i>       | S18-4  | OP198230      | Shrimp: Hepatopancreas | Malaysia: Selangor |
| <i>Vibrio parahaemolyticus</i> | S19-3  | OP198231      | Shrimp: Hepatopancreas | Malaysia: Selangor |
| <i>Vibrio</i> sp.              | S21-3  | OP198232      | Shrimp: Hepatopancreas | Malaysia: Selangor |
| <i>Vibrio campbellii</i>       | S23-4  | OP198233      | Shrimp: Hepatopancreas | Malaysia: Selangor |
| <i>Vibrio rotiferianus</i>     | S24-4  | OP198234      | Shrimp: Hepatopancreas | Malaysia: Selangor |
| <i>Vibrio</i> sp.              | S25    | OP198235      | Shrimp: Hepatopancreas | Malaysia: Selangor |
| <i>Vibrio campbellii</i>       | S31-3  | OP198236      | Shrimp: Hepatopancreas | Malaysia: Selangor |
| <i>Vibrio campbellii</i>       | S31-4  | OP198237      | Shrimp: Hepatopancreas | Malaysia: Selangor |
| <i>Vibrio</i> sp.              | S34-4  | OP198238      | Shrimp: Hepatopancreas | Malaysia: Selangor |
| <i>Vibrio</i> sp.              | S35-4  | OP198239      | Shrimp: Hepatopancreas | Malaysia: Selangor |
| <i>Vibrio parahaemolyticus</i> | M2-4Y  | OP198240      | Shrimp: Hepatopancreas | Malaysia: Melaka   |
| <i>Vibrio parahaemolyticus</i> | M4-3Y  | OP198241      | Shrimp: Hepatopancreas | Malaysia: Melaka   |
| <i>Vibrio parahaemolyticus</i> | M4-4G  | OP198242      | Shrimp: Hepatopancreas | Malaysia: Melaka   |
| <i>Vibrio parahaemolyticus</i> | M4-4Y  | OP198243      | Shrimp: Hepatopancreas | Malaysia: Melaka   |
| <i>Vibrio parahaemolyticus</i> | M5-3G  | OP198244      | Shrimp: Hepatopancreas | Malaysia: Melaka   |
| <i>Vibrio rotiferianus</i>     | M5-3Y  | OP198245      | Shrimp: Hepatopancreas | Malaysia: Melaka   |
| <i>Vibrio parahaemolyticus</i> | M6-3   | OP198246      | Shrimp: Hepatopancreas | Malaysia: Melaka   |
| <i>Vibrio parahaemolyticus</i> | M6-4   | OP198247      | Shrimp: Hepatopancreas | Malaysia: Melaka   |
| <i>Vibrio parahaemolyticus</i> | M7-3Y  | OP198248      | Shrimp: Hepatopancreas | Malaysia: Melaka   |
| <i>Vibrio campbellii</i>       | M8-4Y  | OP198249      | Shrimp: Hepatopancreas | Malaysia: Melaka   |
| <i>Vibrio parahaemolyticus</i> | M9-3G  | OP198250      | Shrimp: Hepatopancreas | Malaysia: Melaka   |
| <i>Vibrio parahaemolyticus</i> | M9-3Y  | OP198251      | Shrimp: Hepatopancreas | Malaysia: Melaka   |
| <i>Vibrio parahaemolyticus</i> | M9-4G  | OP198252      | Shrimp: Hepatopancreas | Malaysia: Melaka   |
| <i>Vibrio parahaemolyticus</i> | M9-4Y  | OP198253      | Shrimp: Hepatopancreas | Malaysia: Melaka   |
| <i>Vibrio parahaemolyticus</i> | M10-3Y | OP198254      | Shrimp: Hepatopancreas | Malaysia: Melaka   |
| <i>Vibrio parahaemolyticus</i> | M10-4  | OP198255      | Shrimp: Hepatopancreas | Malaysia: Melaka   |
| <i>Vibrio parahaemolyticus</i> | M11-3Y | OP198256      | Shrimp: Hepatopancreas | Malaysia: Melaka   |
| <i>Vibrio parahaemolyticus</i> | M11-4G | OP198257      | Shrimp: Hepatopancreas | Malaysia: Melaka   |
| <i>Vibrio parahaemolyticus</i> | M11-4Y | OP198258      | Shrimp: Hepatopancreas | Malaysia: Melaka   |
| <i>Vibrio parahaemolyticus</i> | M12-3G | OP198259      | Shrimp: Hepatopancreas | Malaysia: Melaka   |
| <i>Vibrio parahaemolyticus</i> | M12-3Y | OP198260      | Shrimp: Hepatopancreas | Malaysia: Melaka   |
| <i>Vibrio parahaemolyticus</i> | J1Y    | OP198261      | Shrimp: Hepatopancreas | Malaysia: Johor    |
| <i>Vibrio alginolyticus</i>    | J3Y1   | OP198262      | Shrimp: Hepatopancreas | Malaysia: Johor    |
| <i>Vibrio parahaemolyticus</i> | J3Y2   | OP198263      | Shrimp: Hepatopancreas | Malaysia: Johor    |
| <i>Vibrio parahaemolyticus</i> | J4Y    | OP198264      | Shrimp: Hepatopancreas | Malaysia: Johor    |
| <i>Vibrio parahaemolyticus</i> | J5Y    | OP198265      | Shrimp: Hepatopancreas | Malaysia: Johor    |
| <i>Vibrio parahaemolyticus</i> | J6     | OP198266      | Shrimp: Hepatopancreas | Malaysia: Johor    |
| <i>Vibrio parahaemolyticus</i> | J9Y    | OP198267      | Shrimp: Hepatopancreas | Malaysia: Johor    |

|                                |       |          |                        |                      |
|--------------------------------|-------|----------|------------------------|----------------------|
| <i>Vibrio parahaemolyticus</i> | J10Y  | OP198268 | Shrimp: Hepatopancreas | Malaysia: Johor      |
| <i>Vibrio parahaemolyticus</i> | J11Y  | OP198269 | Shrimp: Hepatopancreas | Malaysia: Johor      |
| <i>Vibrio parahaemolyticus</i> | J14Y  | OP198270 | Shrimp: Hepatopancreas | Malaysia: Johor      |
| <i>Vibrio parahaemolyticus</i> | J15Y  | OP198271 | Shrimp: Hepatopancreas | Malaysia: Johor      |
| <i>Vibrio parahaemolyticus</i> | J17Y1 | OP198272 | Shrimp: Hepatopancreas | Malaysia: Johor      |
| <i>Vibrio parahaemolyticus</i> | J17Y2 | OP198273 | Shrimp: Hepatopancreas | Malaysia: Johor      |
| <i>Vibrio parahaemolyticus</i> | J18Y  | OP198274 | Shrimp: Hepatopancreas | Malaysia: Johor      |
| <i>Vibrio parahaemolyticus</i> | J21Y  | OP198275 | Shrimp: Hepatopancreas | Malaysia: Johor      |
| <i>Vibrio parahaemolyticus</i> | J23   | OP198276 | Shrimp: Hepatopancreas | Malaysia: Johor      |
| <i>Vibrio parahaemolyticus</i> | J24Y1 | OP198277 | Shrimp: Hepatopancreas | Malaysia: Johor      |
| <i>Vibrio parahaemolyticus</i> | J24Y2 | OP198278 | Shrimp: Hepatopancreas | Malaysia: Johor      |
| <i>Vibrio parahaemolyticus</i> | J25Y1 | OP198279 | Shrimp: Hepatopancreas | Malaysia: Johor      |
| <i>Vibrio parahaemolyticus</i> | J25Y2 | OP198280 | Shrimp: Hepatopancreas | Malaysia: Johor      |
| <i>Vibrio parahaemolyticus</i> | J26Y  | OP198281 | Shrimp: Hepatopancreas | Malaysia: Johor      |
| <i>Vibrio parahaemolyticus</i> | J29Y1 | OP198282 | Shrimp: Hepatopancreas | Malaysia: Johor      |
| <i>Vibrio parahaemolyticus</i> | J29Y2 | OP198283 | Shrimp: Hepatopancreas | Malaysia: Johor      |
| <i>Vibrio parahaemolyticus</i> | J31Y  | OP198284 | Shrimp: Hepatopancreas | Malaysia: Johor      |
| <i>Vibrio communis</i>         | K1Y1  | OP198285 | Shrimp: Hepatopancreas | Malaysia: Kedah      |
| <i>Vibrio owensii</i>          | K3Y2  | OP198286 | Shrimp: Hepatopancreas | Malaysia: Kedah      |
| <i>Vibrio communis</i>         | K4Y1  | OP198287 | Shrimp: Hepatopancreas | Malaysia: Kedah      |
| <i>Vibrio alginolyticus</i>    | K5Y   | OP198288 | Shrimp: Hepatopancreas | Malaysia: Kedah      |
| <i>Vibrio brasiliensis</i>     | K6Y   | OP198289 | Shrimp: Hepatopancreas | Malaysia: Kedah      |
| <i>Vibrio communis</i>         | K7Y   | OP198290 | Shrimp: Hepatopancreas | Malaysia: Kedah      |
| <i>Vibrio communis</i>         | K8Y1  | OP198291 | Shrimp: Hepatopancreas | Malaysia: Kedah      |
| <i>Vibrio brasiliensis</i>     | K8Y2  | OP198292 | Shrimp: Hepatopancreas | Malaysia: Kedah      |
| <i>Vibrio communis</i>         | K9Y   | OP198293 | Shrimp: Hepatopancreas | Malaysia: Kedah      |
| <i>Vibrio communis</i>         | K13Y  | OP198294 | Shrimp: Hepatopancreas | Malaysia: Kedah      |
| <i>Vibrio communis</i>         | K14Y1 | OP198295 | Shrimp: Hepatopancreas | Malaysia: Kedah      |
| <i>Vibrio owensii</i>          | K16Y1 | OP198296 | Shrimp: Hepatopancreas | Malaysia: Kedah      |
| <i>Vibrio owensii</i>          | K16Y2 | OP198297 | Shrimp: Hepatopancreas | Malaysia: Kedah      |
| <i>Vibrio rotiferianus</i>     | K17Y1 | OP198298 | Shrimp: Hepatopancreas | Malaysia: Kedah      |
| <i>Vibrio rotiferianus</i>     | K17Y2 | OP198299 | Shrimp: Hepatopancreas | Malaysia: Kedah      |
| <i>Vibrio communis</i>         | K18Y1 | OP198300 | Shrimp: Hepatopancreas | Malaysia: Kedah      |
| <i>Vibrio communis</i>         | K19Y1 | OP198301 | Shrimp: Hepatopancreas | Malaysia: Kedah      |
| <i>Vibrio owensii</i>          | K21Y  | OP198302 | Shrimp: Hepatopancreas | Malaysia: Kedah      |
| <i>Vibrio communis</i>         | K22Y  | OP198303 | Shrimp: Hepatopancreas | Malaysia: Kedah      |
| <i>Vibrio brasiliensis</i>     | K24Y  | OP198304 | Shrimp: Hepatopancreas | Malaysia: Kedah      |
| <i>Vibrio rotiferianus</i>     | K26Y  | OP198305 | Shrimp: Hepatopancreas | Malaysia: Kedah      |
| <i>Vibrio alginolyticus</i>    | K27Y1 | OP198306 | Shrimp: Hepatopancreas | Malaysia: Kedah      |
| <i>Vibrio alginolyticus</i>    | K27Y2 | OP198307 | Shrimp: Hepatopancreas | Malaysia: Kedah      |
| <i>Vibrio communis</i>         | K28Y1 | OP198308 | Shrimp: Hepatopancreas | Malaysia: Kedah      |
| <i>Vibrio rotiferianus</i>     | K30Y  | OP198309 | Shrimp: Hepatopancreas | Malaysia: Kedah      |
| <i>Vibrio communis</i>         | K33Y2 | OP198310 | Shrimp: Hepatopancreas | Malaysia: Kedah      |
| <i>Vibrio rotiferianus</i>     | K34Y2 | OP198311 | Shrimp: Hepatopancreas | Malaysia: Kedah      |
| <i>Vibrio communis</i>         | K36Y1 | OP198312 | Shrimp: Hepatopancreas | Malaysia: Kedah      |
| <i>Vibrio alginolyticus</i>    | K36Y2 | OP198313 | Shrimp: Hepatopancreas | Malaysia: Kedah      |
| <i>Vibrio rotiferianus</i>     | K37Y1 | OP198314 | Shrimp: Hepatopancreas | Malaysia: Kedah      |
| <i>Vibrio alginolyticus</i>    | K37Y2 | OP198315 | Shrimp: Hepatopancreas | Malaysia: Kedah      |
| <i>Vibrio owensii</i>          | K38Y1 | OP198316 | Shrimp: Hepatopancreas | Malaysia: Kedah      |
| <i>Vibrio owensii</i>          | K38Y2 | OP198317 | Shrimp: Hepatopancreas | Malaysia: Kedah      |
| <i>Vibrio brasiliensis</i>     | K40Y  | OP198318 | Shrimp: Hepatopancreas | Malaysia: Kedah      |
| <i>Vibrio alginolyticus</i>    | K41Y  | OP198319 | Shrimp: Hepatopancreas | Malaysia: Kedah      |
| <i>Vibrio parahaemolyticus</i> | T1G   | OP198320 | Shrimp: Hepatopancreas | Malaysia: Terengganu |
| <i>Vibrio parahaemolyticus</i> | T2G   | OP198321 | Shrimp: Hepatopancreas | Malaysia: Terengganu |
| <i>Vibrio parahaemolyticus</i> | T3G   | OP198322 | Shrimp: Hepatopancreas | Malaysia: Terengganu |
| <i>Vibrio parahaemolyticus</i> | T4G1  | OP198323 | Shrimp: Hepatopancreas | Malaysia: Terengganu |
| <i>Vibrio owensii</i>          | T5Y1  | OP198324 | Shrimp: Hepatopancreas | Malaysia: Terengganu |

|                                |       |          |                        |                      |
|--------------------------------|-------|----------|------------------------|----------------------|
| <i>Vibrio parahaemolyticus</i> | T6G   | OP198325 | Shrimp: Hepatopancreas | Malaysia: Terengganu |
| <i>Vibrio parahaemolyticus</i> | T7G1  | OP198326 | Shrimp: Hepatopancreas | Malaysia: Terengganu |
| <i>Vibrio parahaemolyticus</i> | T8Y2  | OP198327 | Shrimp: Hepatopancreas | Malaysia: Terengganu |
| <i>Vibrio parahaemolyticus</i> | T10Y1 | OP198328 | Shrimp: Hepatopancreas | Malaysia: Terengganu |
| <i>Vibrio parahaemolyticus</i> | T11G  | OP198329 | Shrimp: Hepatopancreas | Malaysia: Terengganu |
| <i>Vibrio parahaemolyticus</i> | T12Y  | OP198330 | Shrimp: Hepatopancreas | Malaysia: Terengganu |
| <i>Vibrio parahaemolyticus</i> | T13G  | OP198331 | Shrimp: Hepatopancreas | Malaysia: Terengganu |
| <i>Vibrio parahaemolyticus</i> | T14G  | OP198332 | Shrimp: Hepatopancreas | Malaysia: Terengganu |
| <i>Vibrio parahaemolyticus</i> | T15G  | OP198333 | Shrimp: Hepatopancreas | Malaysia: Terengganu |
| <i>Vibrio parahaemolyticus</i> | T16G  | OP198334 | Shrimp: Hepatopancreas | Malaysia: Terengganu |
| <i>Vibrio owensii</i>          | T17G4 | OP198335 | Shrimp: Hepatopancreas | Malaysia: Terengganu |
| <i>Vibrio parahaemolyticus</i> | T18G1 | OP198336 | Shrimp: Hepatopancreas | Malaysia: Terengganu |
| <i>Vibrio parahaemolyticus</i> | T19G  | OP198337 | Shrimp: Hepatopancreas | Malaysia: Terengganu |
| <i>Vibrio owensii</i>          | T20G2 | OP198338 | Shrimp: Hepatopancreas | Malaysia: Terengganu |
| <i>Vibrio parahaemolyticus</i> | T21Y2 | OP198339 | Shrimp: Hepatopancreas | Malaysia: Terengganu |
| <i>Vibrio parahaemolyticus</i> | T22   | OP198340 | Shrimp: Hepatopancreas | Malaysia: Terengganu |
| <i>Vibrio owensii</i>          | T23G1 | OP198341 | Shrimp: Hepatopancreas | Malaysia: Terengganu |
| <i>Vibrio parahaemolyticus</i> | T23G2 | OP198342 | Shrimp: Hepatopancreas | Malaysia: Terengganu |
| <i>Vibrio owensii</i>          | T23G5 | OP198343 | Shrimp: Hepatopancreas | Malaysia: Terengganu |
| <i>Vibrio parahaemolyticus</i> | T24G  | OP198344 | Shrimp: Hepatopancreas | Malaysia: Terengganu |
| <i>Vibrio parahaemolyticus</i> | T25G  | OP198345 | Shrimp: Hepatopancreas | Malaysia: Terengganu |
| <i>Vibrio parahaemolyticus</i> | T26G  | OP198346 | Shrimp: Hepatopancreas | Malaysia: Terengganu |
| <i>Vibrio parahaemolyticus</i> | T28G  | OP198347 | Shrimp: Hepatopancreas | Malaysia: Terengganu |
| <i>Vibrio parahaemolyticus</i> | T29G1 | OP198348 | Shrimp: Hepatopancreas | Malaysia: Terengganu |
| <i>Vibrio parahaemolyticus</i> | T30G1 | OP198349 | Shrimp: Hepatopancreas | Malaysia: Terengganu |
| <i>Vibrio parahaemolyticus</i> | T31G  | OP198350 | Shrimp: Hepatopancreas | Malaysia: Terengganu |
| <i>Vibrio parahaemolyticus</i> | T32G  | OP198351 | Shrimp: Hepatopancreas | Malaysia: Terengganu |
| <i>Vibrio parahaemolyticus</i> | T33   | OP198352 | Shrimp: Hepatopancreas | Malaysia: Terengganu |
| <i>Vibrio owensii</i>          | T34Y  | OP198353 | Shrimp: Hepatopancreas | Malaysia: Terengganu |
| <i>Vibrio parahaemolyticus</i> | T38G1 | OP198354 | Shrimp: Hepatopancreas | Malaysia: Terengganu |
| <i>Vibrio parahaemolyticus</i> | T39G1 | OP198355 | Shrimp: Hepatopancreas | Malaysia: Terengganu |
| <i>Vibrio communis</i>         | P1Y   | OP198356 | Shrimp: Hepatopancreas | Malaysia: Perak      |
| <i>Vibrio campbellii</i>       | P3Y1  | OP198357 | Shrimp: Hepatopancreas | Malaysia: Perak      |
| <i>Vibrio rotiferianus</i>     | P7G   | OP198358 | Shrimp: Hepatopancreas | Malaysia: Perak      |
| <i>Vibrio campbellii</i>       | P8Y   | OP198359 | Shrimp: Hepatopancreas | Malaysia: Perak      |
| <i>Vibrio parahaemolyticus</i> | P10G  | OP198360 | Shrimp: Hepatopancreas | Malaysia: Perak      |
| <i>Vibrio communis</i>         | P11Y  | OP198361 | Shrimp: Hepatopancreas | Malaysia: Perak      |
| <i>Vibrio rotiferianus</i>     | P12Y  | OP198362 | Shrimp: Hepatopancreas | Malaysia: Perak      |
| <i>Vibrio xuii</i>             | P13Y1 | OP198363 | Shrimp: Hepatopancreas | Malaysia: Perak      |
| <i>Vibrio communis</i>         | P13Y2 | OP198364 | Shrimp: Hepatopancreas | Malaysia: Perak      |
| <i>Vibrio parahaemolyticus</i> | P14G  | OP198365 | Shrimp: Hepatopancreas | Malaysia: Perak      |
| <i>Vibrio harveyi</i>          | P19Y  | OP198366 | Shrimp: Hepatopancreas | Malaysia: Perak      |
| <i>Vibrio rotiferianus</i>     | P20Y1 | OP198367 | Shrimp: Hepatopancreas | Malaysia: Perak      |
| <i>Vibrio campbellii</i>       | P21Y  | OP198368 | Shrimp: Hepatopancreas | Malaysia: Perak      |
| <i>Vibrio parahaemolyticus</i> | P21G  | OP198369 | Shrimp: Hepatopancreas | Malaysia: Perak      |
| <i>Vibrio parahaemolyticus</i> | P22G  | OP198370 | Shrimp: Hepatopancreas | Malaysia: Perak      |
| <i>Vibrio harveyi</i>          | P23Y1 | OP198371 | Shrimp: Hepatopancreas | Malaysia: Perak      |
| <i>Vibrio communis</i>         | P23Y2 | OP198372 | Shrimp: Hepatopancreas | Malaysia: Perak      |
| <i>Vibrio campbellii</i>       | P24G  | OP198373 | Shrimp: Hepatopancreas | Malaysia: Perak      |
| <i>Vibrio communis</i>         | P25G  | OP198374 | Shrimp: Hepatopancreas | Malaysia: Perak      |
| <i>Vibrio campbellii</i>       | P25Y1 | OP198375 | Shrimp: Hepatopancreas | Malaysia: Perak      |
| <i>Vibrio campbellii</i>       | P25Y2 | OP198376 | Shrimp: Hepatopancreas | Malaysia: Perak      |
| <i>Vibrio owensii</i>          | P27Y  | OP198377 | Shrimp: Hepatopancreas | Malaysia: Perak      |
| <i>Vibrio parahaemolyticus</i> | P29G  | OP198378 | Shrimp: Hepatopancreas | Malaysia: Perak      |
| <i>Vibrio campbellii</i>       | P28G2 | OP198379 | Shrimp: Hepatopancreas | Malaysia: Perak      |
| <i>Vibrio xuii</i>             | P29Y  | OP198380 | Shrimp: Hepatopancreas | Malaysia: Perak      |
| <i>Vibrio campbellii</i>       | P31Y  | OP198381 | Shrimp: Hepatopancreas | Malaysia: Perak      |

|                                |        |          |                        |                    |
|--------------------------------|--------|----------|------------------------|--------------------|
| <i>Vibrio campbellii</i>       | P32Y   | OP198382 | Shrimp: Hepatopancreas | Malaysia: Perak    |
| <i>Vibrio parahaemolyticus</i> | P33G   | OP198383 | Shrimp: Hepatopancreas | Malaysia: Perak    |
| <i>Vibrio owensii</i>          | P34Y   | OP198384 | Shrimp: Hepatopancreas | Malaysia: Perak    |
| <i>Vibrio natriegens</i>       | V1Y    | OP198384 | Shrimp: Hepatopancreas | Malaysia: Selangor |
| <i>Vibrio natriegens</i>       | V1Y2   | OP198386 | Shrimp: Hepatopancreas | Malaysia: Selangor |
| <i>Vibrio parahaemolyticus</i> | V1G    | OP198387 | Shrimp: Hepatopancreas | Malaysia: Selangor |
| <i>Vibrio parahaemolyticus</i> | V1G2   | OP198388 | Shrimp: Hepatopancreas | Malaysia: Selangor |
| <i>Vibrio natriegens</i>       | V1G2Y  | OP198389 | Shrimp: Hepatopancreas | Malaysia: Selangor |
| <i>Vibrio parahaemolyticus</i> | V1G3   | OP198390 | Shrimp: Hepatopancreas | Malaysia: Selangor |
| <i>Vibrio natriegens</i>       | V2Y    | OP198391 | Shrimp: Hepatopancreas | Malaysia: Selangor |
| <i>Vibrio parahaemolyticus</i> | V2G    | OP198392 | Shrimp: Hepatopancreas | Malaysia: Selangor |
| <i>Vibrio parahaemolyticus</i> | V3G1   | OP198393 | Shrimp: Hepatopancreas | Malaysia: Selangor |
| <i>Vibrio parahaemolyticus</i> | V3G2   | OP198394 | Shrimp: Hepatopancreas | Malaysia: Selangor |
| <i>Vibrio parahaemolyticus</i> | V3G3-1 | OP198395 | Shrimp: Hepatopancreas | Malaysia: Selangor |
| <i>Vibrio parahaemolyticus</i> | V3Y3   | OP198396 | Shrimp: Hepatopancreas | Malaysia: Selangor |
| <i>Vibrio parahaemolyticus</i> | V3Y2G  | OP198397 | Shrimp: Hepatopancreas | Malaysia: Selangor |
| <i>Vibrio parahaemolyticus</i> | V3Y3G  | OP198398 | Shrimp: Hepatopancreas | Malaysia: Selangor |
| <i>Vibrio parahaemolyticus</i> | V3Y2Y  | OP198399 | Shrimp: Hepatopancreas | Malaysia: Selangor |
| <i>Vibrio natriegens</i>       | V4Y1   | OP198400 | Shrimp: Hepatopancreas | Malaysia: Selangor |
| <i>Vibrio parahaemolyticus</i> | V4G1   | OP198401 | Shrimp: Hepatopancreas | Malaysia: Selangor |
| <i>Vibrio parahaemolyticus</i> | V4G2   | OP198402 | Shrimp: Hepatopancreas | Malaysia: Selangor |
| <i>Vibrio parahaemolyticus</i> | V4Y3   | OP198403 | Shrimp: Hepatopancreas | Malaysia: Selangor |
| <i>Vibrio parahaemolyticus</i> | V5G    | OP198404 | Shrimp: Hepatopancreas | Malaysia: Selangor |
| <i>Vibrio parahaemolyticus</i> | V5Y1   | OP198405 | Shrimp: Hepatopancreas | Malaysia: Selangor |
| <i>Vibrio parahaemolyticus</i> | V6G    | OP198406 | Shrimp: Hepatopancreas | Malaysia: Selangor |
| <i>Vibrio parahaemolyticus</i> | V7Y    | OP198407 | Shrimp: Hepatopancreas | Malaysia: Selangor |
| <i>Vibrio parahaemolyticus</i> | V7G1   | OP198408 | Shrimp: Hepatopancreas | Malaysia: Selangor |
| <i>Vibrio parahaemolyticus</i> | V7G2   | OP198409 | Shrimp: Hepatopancreas | Malaysia: Selangor |
| <i>Vibrio parahaemolyticus</i> | V7G3   | OP198410 | Shrimp: Hepatopancreas | Malaysia: Selangor |
| <i>Vibrio parahaemolyticus</i> | V7G3-1 | OP198411 | Shrimp: Hepatopancreas | Malaysia: Selangor |
| <i>Vibrio parahaemolyticus</i> | V8G1   | OP198412 | Shrimp: Hepatopancreas | Malaysia: Selangor |
| <i>Vibrio parahaemolyticus</i> | V14G2  | OP198413 | Shrimp: Hepatopancreas | Malaysia: Selangor |
| <i>Vibrio parahaemolyticus</i> | V14G1  | OP198414 | Shrimp: Hepatopancreas | Malaysia: Selangor |
| <i>Vibrio parahaemolyticus</i> | V15G   | OP198415 | Shrimp: Hepatopancreas | Malaysia: Selangor |
| <i>Vibrio parahaemolyticus</i> | V22G1  | OP198416 | Shrimp: Hepatopancreas | Malaysia: Selangor |
| <i>Vibrio parahaemolyticus</i> | V22Y2  | OP198417 | Shrimp: Hepatopancreas | Malaysia: Selangor |
| <i>Vibrio parahaemolyticus</i> | V22G2  | OP198418 | Shrimp: Hepatopancreas | Malaysia: Selangor |
| <i>Vibrio parahaemolyticus</i> | V22Y1  | OP198419 | Shrimp: Hepatopancreas | Malaysia: Selangor |
| <i>Vibrio parahaemolyticus</i> | V23Y1  | OP198420 | Shrimp: Hepatopancreas | Malaysia: Selangor |
| <i>Vibrio parahaemolyticus</i> | V23G1  | OP198421 | Shrimp: Hepatopancreas | Malaysia: Selangor |
| <i>Vibrio parahaemolyticus</i> | V23Y2  | OP198422 | Shrimp: Hepatopancreas | Malaysia: Selangor |
| <i>Vibrio parahaemolyticus</i> | V24G1  | OP198423 | Shrimp: Hepatopancreas | Malaysia: Selangor |
| <i>Vibrio parahaemolyticus</i> | V24G2  | OP198424 | Shrimp: Hepatopancreas | Malaysia: Selangor |
| <i>Vibrio parahaemolyticus</i> | V25G   | OP198425 | Shrimp: Hepatopancreas | Malaysia: Selangor |
| <i>Vibrio parahaemolyticus</i> | MG2    | OP198426 | Shrimp: Hepatopancreas | Malaysia: Selangor |
| <i>Vibrio parahaemolyticus</i> | MG2Y   | OP198427 | Shrimp: Hepatopancreas | Malaysia: Selangor |
| <i>Vibrio parahaemolyticus</i> | M2Y2   | OP198428 | Shrimp: Hepatopancreas | Malaysia: Selangor |
| <i>Vibrio parahaemolyticus</i> | M5G2   | OP198429 | Shrimp: Hepatopancreas | Malaysia: Selangor |
| <i>Vibrio parahaemolyticus</i> | M5Y2   | OP198430 | Shrimp: Hepatopancreas | Malaysia: Selangor |
| <i>Vibrio parahaemolyticus</i> | M5Y1   | OP198431 | Shrimp: Hepatopancreas | Malaysia: Selangor |
| <i>Vibrio owensii</i>          | M6Y    | OP198432 | Shrimp: Hepatopancreas | Malaysia: Selangor |
| <i>Vibrio hepatarius</i>       | M13Y   | OP198433 | Shrimp: Hepatopancreas | Malaysia: Selangor |
